# Supplementary material for: Local and Systemic Humoral Response to Autologous Lineage-Negative Cells Intrathecal Administration in ALS Patients
Source: MDPI journal article supplement (doi:10.3390/ijms21031070), 2020-02-06
Supplement: s1 [file s1]

### Supplementary File 3

List of 10 most up- and down-regulated genes for each individual patient in 7<sup>th</sup> day after cells administration.

| Change in 7 <sup>th</sup> day | Gene symbol   | Gene name                                                                               | Fold change |
|-------------------------------|---------------|-----------------------------------------------------------------------------------------|-------------|
| <b>Patient 1</b>              |               |                                                                                         |             |
| Up                            | IGKV1-5       | immunoglobulin kappa variable 1-5                                                       | 5.50        |
| Up                            | IGHG1         | immunoglobulin heavy constant gamma 1 (G1m marker)                                      | 4.37        |
| Up                            | SNORD18B      | small nucleolar RNA, C/D box 18B                                                        | 3.83        |
| Up                            | SNORD55       | small nucleolar RNA, C/D box 55                                                         | 3.44        |
| Up                            | IGHV3-23      | immunoglobulin heavy variable 3-23                                                      | 3.34        |
| Up                            | HIST1H2AJ     | histone cluster 1, H2aj                                                                 | 2.97        |
| Up                            | IGHD          | immunoglobulin heavy constant delta                                                     | 2.92        |
| Up                            | PI3           | peptidase inhibitor 3, skin-derived                                                     | 2.91        |
| Up                            | SNORD23       | small nucleolar RNA, C/D box 23                                                         | 2.90        |
| Up                            | C2CD4A        | C2 calcium-dependent domain containing 4A                                               | 2.85        |
| Down                          | HNRNPU-AS1    | HNRNPU antisense RNA 1                                                                  | -3.84       |
| Down                          | GNAI3         | guanine nucleotide binding protein (G protein), alpha inhibiting activity polypeptide 3 | -3.91       |
| Down                          | TAS2R30       | taste receptor, type 2, member 30                                                       | -4.04       |
| Down                          | TAF1D         | TATA box binding protein (TBP)-associated factor, RNA polymerase I, D, 41kDa            | -4.18       |
| Down                          | ASAP1-IT2     | ASAP1 intronic transcript 2 (non-protein coding)                                        | -4.27       |
| Down                          | ARHGAP15      | Rho GTPase activating protein 15                                                        | -4.54       |
| Down                          | DKFZp667F0711 | uncharacterized protein DKFZp667F0711                                                   | -4.87       |
| Down                          | PDE3B         | phosphodiesterase 3B, cGMP-inhibited                                                    | -5.25       |
| Down                          | ASAP1-IT1     | ASAP1 intronic transcript 1 (non-protein coding)                                        | -5.39       |
| Down                          | TRAJ12        | T cell receptor alpha joining 12                                                        | -5.40       |
| <b>Patient 2</b>              |               |                                                                                         |             |
| Up                            | HIST1H2AK     | histone cluster 1, H2ak                                                                 | 12.81       |
| Up                            | HIST1H2BF     | histone cluster 1, H2bf                                                                 | 11.85       |
| Up                            | SUMO2         | small ubiquitin-like modifier 2                                                         | 9.25        |
| Up                            | MIR616        | microRNA 616                                                                            | 9.09        |
| Up                            | TRAJ35        | T cell receptor alpha joining 35 (non-functional)                                       | 8.29        |
| Up                            | CBWD1         | COBW domain containing 1                                                                | 8.06        |
| Up                            | TRAJ34        | T cell receptor alpha joining 34                                                        | 7.72        |
| Up                            | APOBEC3C      | apolipoprotein B mRNA editing enzyme, catalytic polypeptide-like 3C                     | 7.70        |
| Up                            | SLCO4C1       | solute carrier organic anion transporter family, member 4C1                             | 7.34        |
| Up                            | TRGJP1        | T cell receptor gamma joining P1                                                        | 7.26        |
| Down                          | PP13          | uncharacterized LOC100129503                                                            | -3.64       |
| Down                          | PRAMEF26      | PRAME family member 26                                                                  | -3.69       |
| Down                          | SNORA5C       | small nucleolar RNA, H/ACA box 5C                                                       | -3.89       |
| Down                          | RNU11         | RNA, U11 small nuclear                                                                  | -4.50       |
| Down                          | GNB2L1        | guanine nucleotide binding protein (G protein), beta polypeptide 2-like 1               | -4.98       |
| Down                          | RPS3A         | ribosomal protein S3A                                                                   | -5.09       |

### Supplementary File 3

List of 10 most up- and down-regulated genes for each individual patient in 7<sup>th</sup> day after cells administration.

|                  |             |                                                       |        |
|------------------|-------------|-------------------------------------------------------|--------|
| Down             | SNORA61     | small nucleolar RNA, H/ACA box 61                     | -5.25  |
| Down             | SNORA6      | small nucleolar RNA, H/ACA box 6                      | -5.38  |
| Down             | SNORA72     | small nucleolar RNA, H/ACA box 72                     | -7.42  |
| Down             | SNORA44     | small nucleolar RNA, H/ACA box 44                     | -7.79  |
| <b>Patient 3</b> |             |                                                       |        |
| Up               | ZNF595      | zinc finger protein 595                               | 48.19  |
| Up               | USP17L5     | ubiquitin specific peptidase 17-like family member 5  | 32.93  |
| Up               | USP17L15    | ubiquitin specific peptidase 17-like family member 15 | 30.60  |
| Up               | SNORD115-5  | small nucleolar RNA, C/D box 115-5                    | 19.23  |
| Up               | SNORD115-20 | small nucleolar RNA, C/D box 115-20                   | 17.15  |
| Up               | DBET        | D4Z4 binding element transcript (non-protein coding)  | 13.42  |
| Up               | SNORD115-4  | small nucleolar RNA, C/D box 115-4                    | 12.59  |
| Up               | SNORD115-44 | small nucleolar RNA, C/D box 115-44                   | 11.45  |
| Up               | DUX4L1      | double homeobox 4 like 1                              | 9.60   |
| Up               | DUX4        | double homeobox 4                                     | 8.92   |
| Down             | SNORD102    | small nucleolar RNA, C/D box 102                      | -14.82 |
| Down             | SNORA65     | small nucleolar RNA, H/ACA box 65                     | -15.32 |
| Down             | SNORD34     | small nucleolar RNA, C/D box 34                       | -17.16 |
| Down             | SNORD36C    | small nucleolar RNA, C/D box 36C                      | -17.98 |
| Down             | SNORD56     | small nucleolar RNA, C/D box 56                       | -19.58 |
| Down             | SNORA64     | small nucleolar RNA, H/ACA box 64                     | -19.81 |
| Down             | SNORD16     | small nucleolar RNA, C/D box 16                       | -24.26 |
| Down             | SNORA68     | small nucleolar RNA, H/ACA box 68                     | -47.12 |
| Down             | SNORA72     | small nucleolar RNA, H/ACA box 72                     | -53.82 |
| Down             | SNORA18     | small nucleolar RNA, H/ACA box 18                     | -57.25 |
