# Supplementary material for: Local and Systemic Humoral Response to Autologous Lineage-Negative Cells Intrathecal Administration in ALS Patients
Source: MDPI journal article supplement (doi:10.3390/ijms21031070), 2020-02-06
Supplement: s1 [file s1]

## Supplementary File 1

Correlations between plasma concentrations of analyzed factors and clinical outcome assessed using ALS-FRSr and Norris scale.  $r_s$  – Spearman's correlation coefficient.  
 $p < 0.05$  is highlighted with bold font.

| Blood plasma concentrations |             | ALS-FRSr day 28 vs. 0<br>(valid calculations n = 16) |              | Norris day 28 vs. 0<br>(valid calculations n = 16) |           |
|-----------------------------|-------------|------------------------------------------------------|--------------|----------------------------------------------------|-----------|
|                             |             | $r_s$                                                | $p$ value    | $r_s$                                              | $p$ value |
| CRP                         | day 3 vs. 0 | 0.046                                                | 0.867        | - 0.057                                            | 0.846     |
|                             | day 5 vs. 0 | 0.042                                                | 0.876        | 0.195                                              | 0.505     |
|                             | day 7 vs. 0 | 0.386                                                | 0.139        | 0.323                                              | 0.260     |
| BDNF                        | day 3 vs. 0 | - 0.218                                              | 0.417        | - 0.110                                            | 0.708     |
|                             | day 5 vs. 0 | - 0.576                                              | <b>0.019</b> | - 0.344                                            | 0.229     |
|                             | day 7 vs. 0 | - 0.383                                              | 0.143        | - 0.131                                            | 0.656     |
| NGF beta                    | day 3 vs. 0 | - 0.116                                              | 0.668        | - 0.082                                            | 0.779     |
|                             | day 5 vs. 0 | - 0.022                                              | 0.935        | 0.037                                              | 0.901     |
|                             | day 7 vs. 0 | - 0.217                                              | 0.420        | 0.174                                              | 0.552     |
| NT-3                        | day 3 vs. 0 | - 0.278                                              | 0.296        | 0.010                                              | 0.972     |
|                             | day 5 vs. 0 | - 0.218                                              | 0.417        | 0.200                                              | 0.493     |
|                             | day 7 vs. 0 | 0.006                                                | 0.982        | 0.338                                              | 0.237     |
