# Supplementary material for: Local and Systemic Humoral Response to Autologous Lineage-Negative Cells Intrathecal Administration in ALS Patients
Source: MDPI journal article supplement (doi:10.3390/ijms21031070), 2020-02-06
Supplement: s1 [file s1]

## Supplementary File 2

Detailed characteristic of three patients randomly chosen for microarray gene expression analysis.

|                                                                      | Patient 1 | Patient 2 | Patient 3 |
|----------------------------------------------------------------------|-----------|-----------|-----------|
| Age (years)                                                          | 61        | 60        | 55        |
| Sex                                                                  | Male      | Male      | Female    |
| ALS duration (months)                                                | 96        | 25        | 36        |
| Number of obtained bone marrow mononuclear cells (x10 <sup>6</sup> ) | 140       | 192.5     | 150       |
| Number of administered Lin <sup>-</sup> cells (x10 <sup>6</sup> )    | 2.0       | 1.8       | 2.3       |
| ALS-FRSr result in Day 0                                             | 29        | 29        | 22        |
| ALS-FRSr result in 28 <sup>th</sup> day                              | 34        | 24        | 22        |
| Norris scale result in Day 0                                         | 79        | 80        | 75        |
| Norris scale result in 28 <sup>th</sup> day                          | 100       | 77        | 75        |
